# Supplementary material for: Streptavidin-Modified Iron Oxide Hybrid Nanozymes for Magnetic Enrichment and Bioelectrocatalytic Sensing of Circulating Tumor RNA
Source: Preprints.org preprint supplement (doi:10.20944/preprints202210.0325.v1), 2022-10-21
Supplement: Supplementary file 1 [file supplementary]

***Supplementary Information***

**Streptavidin-Modified Iron Oxide Hybrid Nanozymes for Magnetic Enrichment and Bioelectrocatalytic Sensing of Circulating Tumor RNA**

Kevin M. Koo1,2,*

1The University of Queensland Centre for Clinical Research (UQCCR), QLD 4029, Australia

2XING Applied Research & Assay Development (XARAD) Division, XING Technologies Pty Ltd, QLD 4073, Australia

Correspondence: maisheng.koo@uqconnect.edu.au

**Table S1** Primer sequences.

| Oligos | 5'-Sequence-3' |
| --- | --- |
| T2:ERG Forward Primer | Bio-C6-CGGCAGGAAGCCTTATCA |
| T2:ERG Reverse Primer | GTTACATTCCATTTTGAT |
| *PCA3* Forward Primer | Bio-C6-CCTGATGATACAGAGGTGAG |
| *PCA3* Reverse Primer | GCACAGGGCGAGGCTCATCG |
| *KLK2* Forward Primer | Bio-C6-GGGGGTCCACTTGTCTGTAA |
| *KLK2* Reverse Primer | GGTGAGTTCCAAGCTTCAGG |

**Key:** Bio-C6-, Biotin modification with 6-carbon spacer.


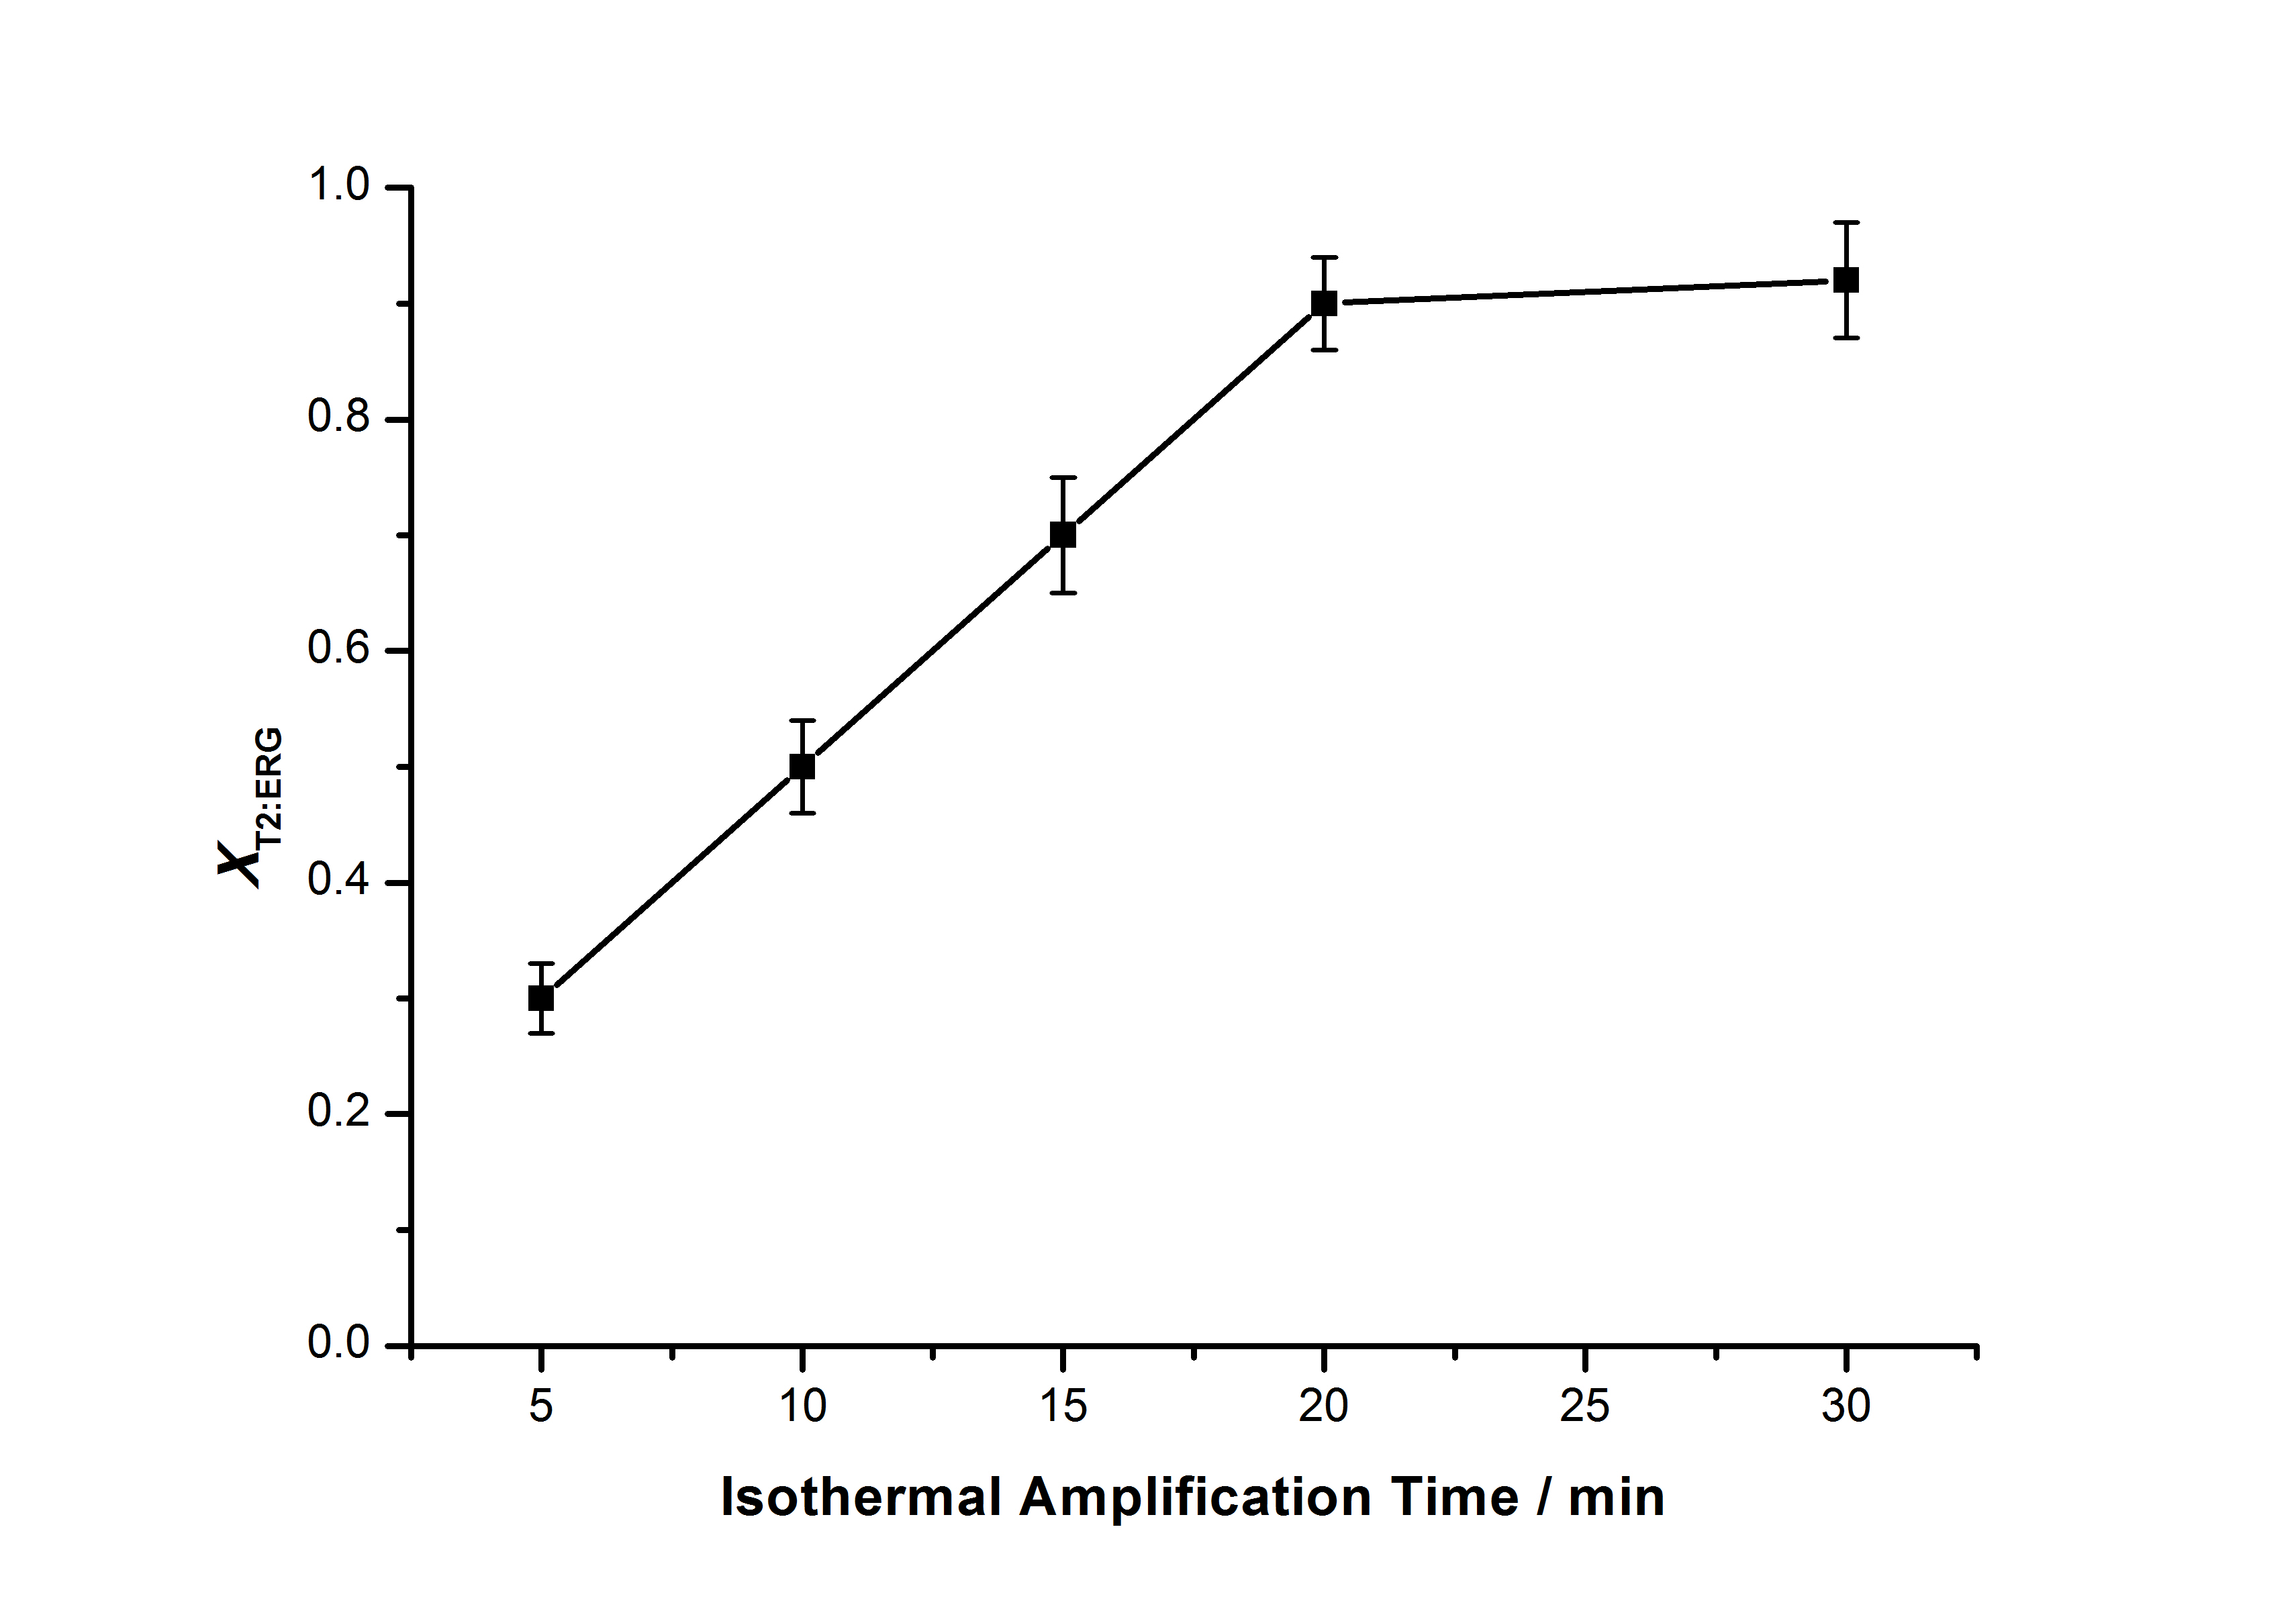
**Figure S1.** Optimization of isothermal amplification times (5, 10, 15, 20, and 30 min). Error bars represent standard deviations of three technical replicates.

**
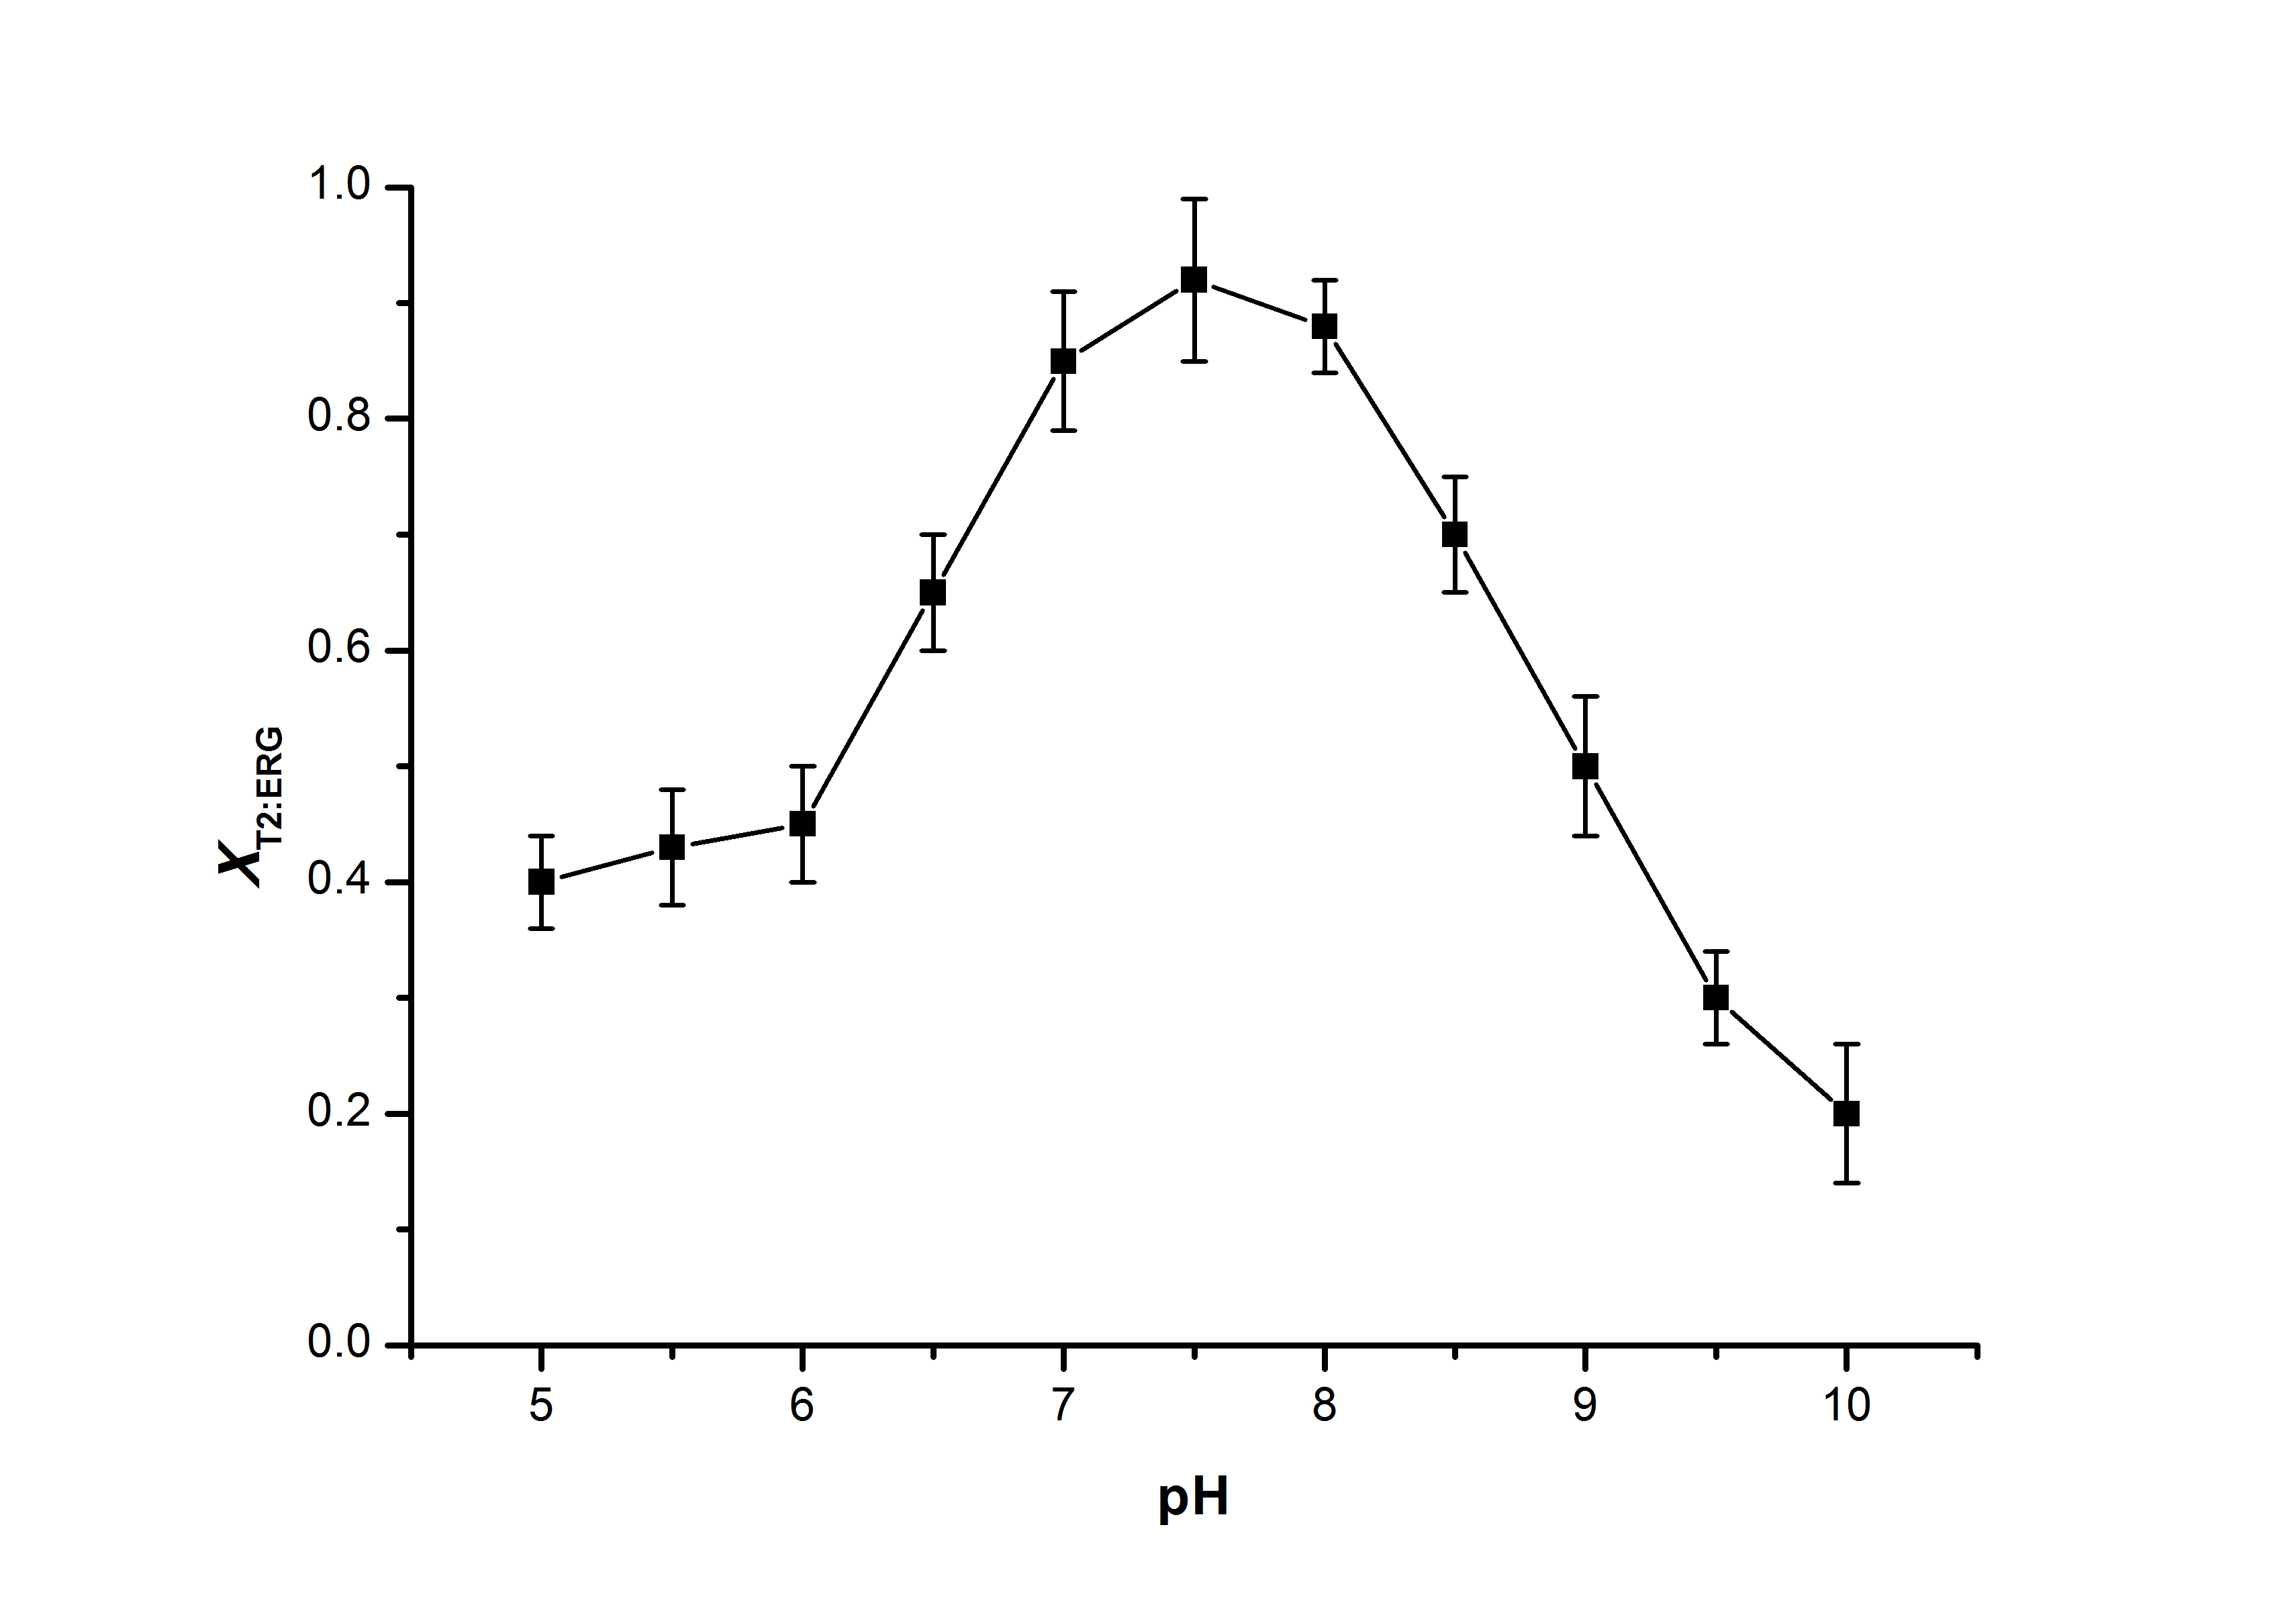
**

**Figure S2.** Optimization of electrolyte buffer pH 5.0 – 10.0. Error bars represent standard deviations of three technical replicates.
